# Supplementary material
Source: PubMed Central journal article supplement (PMC7063444)
Supplement: mmc1.pdf [file mmc1.pdf]

**Biophysical Journal, Volume 118**

**Supplemental Information**

**Model Plasma Membrane Exhibits a Microemulsion in Both Leaves Providing a Foundation for “Rafts”**

**David W. Allender, Ha Giang, and M. Schick**

Supplementary Material for

Model Plasma Membrane exhibits a Microemulsion in both Leaves providing a Foundation  
for “Rafts”

D.W. Allender, H. Giang, and M. Schick

We write the fluctuation part of the free energy, given by Eqs (39) and (40) of the paper in the form

$$\frac{\delta F}{k_B T} = \frac{A^2}{(2\pi)^2 a^2} \int d^2 p \phi_i^T(p) \cdot M_{i,j} \cdot \phi_j(p), \quad (1)$$

where  $M_{i,j} = M_{j,i}$  and  $p \equiv a^{1/2}k$ .

We recall the expressions for the cholesterol-dependent spontaneous curvature of the outer leaf, Eq.(15),

$$\frac{\kappa_m^O H_0^O}{k_B T} = \left[ \frac{y_{SM}}{y_{SM} + y_{PCo}} (a_{SM} - b_{SM} y_{Co}) + \frac{y_{PCo}}{y_{SM} + y_{PCo}} (a_{PC} - b_{PC} y_{Co}) \right], \quad 0.25 \leq y_{Ci} \leq 0.6 \quad (2)$$

and for the inner leaf, Eq.(16),

$$\begin{aligned} \frac{\kappa_m^I H_0^I}{k_B T} = & - \left[ \frac{y_{PE}}{y_{PE} + y_{PS} + y_{PCi}} (a_{PE} - b_{PE} y_{Ci}) + \frac{y_{PS}}{y_{PE} + y_{PS} + y_{PCi}} (a_{PS} - b_{PS} y_{Ci}) + \right. \\ & \left. + \frac{y_{PCi}}{y_{PE} + y_{PS} + y_{PCi}} (a_{PC} - b_{PC} y_{Ci}) \right], \quad 0.25 \leq y_{Ci} \leq 0.6 \end{aligned} \quad (3)$$

To evaluate the derivatives of the  $H_0^O$  and  $H_0^I$  with respect to the various mol fractions  $y$ , we define the quantities

$$z_o = (1 - \bar{y}_{Co}),$$

where the overbar denotes the equilibrium value, and

$$C^O = f_{SM}a_{SM} + f_{PCo}a_{PC} - \bar{y}_{Co}[f_{SM}b_{SM} + f_{PCo}b_{PC}] \quad (4)$$

Here  $f_i$  is the fraction of phospholipids in the monolayer of type i, that is

$$f_{SM} = \frac{\bar{y}_{SM}}{\bar{y}_{SM} + \bar{y}_{PCo}} \quad f_{PCo} = \frac{\bar{y}_{PCo}}{\bar{y}_{SM} + \bar{y}_{PCo}}$$

$$C_{SM} = (a_{SM} - a_{PC}) - (\bar{y}_{Co})[b_{SM} - b_{PC}]$$

$$C_{Co} = f_{SM}Q_{SM} - z_o b_{PC} \quad \text{where}$$

$$Q_{SM} = (a_{SM} - b_{SM}) - (a_{PC} - b_{PC})$$

$$C_{SM-C} = Q_{SM}$$

$$C_{Co-Co} = (f_{SM})Q_{SM}.$$

$$z_i = (1 - \bar{y}_{Ci})$$

$$C^I = f_{PE}a_{PE} + f_{PS}a_{PS} + f_{PCi}a_{PC} - \bar{y}_{Ci}[f_{PE}b_{PE} + f_{PS}b_{PS} + f_{PCi}b_{PC}]$$

$$C_{PE} = (a_{PE} - a_{PC}) - (\bar{y}_{Ci})[b_{PE} - b_{PC}]$$

$$C_{PS} = (a_{PS} - a_{PC}) - (\bar{y}_{Ci})[b_{PS} - b_{PC}]$$

$$C_{Ci} = f_{PE}Q_{PE} + f_{PS}Q_{PS} - z_i b_{PC}$$

$$Q_{PE} = (a_{PE} - b_{PE}) - (a_{PC} - b_{PC})$$

$$Q_{PS} = (a_{PS} - b_{PS}) - (a_{PC} - b_{PC})$$

$$C_{PE-C} = Q_{PE}$$

$$C_{PS-C} = Q_{PS}$$

$$C_{Ci-Ci} = (f_{PE})Q_{PE} + f_{PS}Q_{PS}$$

With the above definitions, and Eqs. (5) and (6) of the text for  $\rho(y_C)$ , the matrix elements are as follows:

$$\begin{aligned} M_{11} \equiv M_{SM,SM} &= a\rho(\bar{y}_{C_o}) \left[ \frac{1}{2\bar{y}_{PC_o}} + \frac{1}{2\bar{y}_{SM}} - 6\frac{\epsilon_{SM,PC}}{k_B T} \right] \\ &+ \frac{b}{k_B T} p^2 + \left( \frac{k_B T}{\kappa_b} \right) a \frac{C_{SM}^2}{z_o^2} \\ &- \left( \frac{k_B T}{\kappa_b} \right) \frac{p^2}{2((\sigma a/\kappa_b) + p^2)} a \left( \frac{C_{SM}}{z_o} \right)^2 \end{aligned} \quad (5)$$

$$\begin{aligned} M_{12} \equiv M_{SM,C_o} &= a\rho(\bar{y}_{C_o}) \left[ \frac{1}{2\bar{y}_{PC_o}} + 3\frac{\epsilon_{SM,C}}{k_B T} - 3\frac{\epsilon_{SM,PC}}{k_B T} - 3\frac{\epsilon_{PC,C}}{k_B T} \right] \\ &- a^2(1-r_a)\rho^2(\bar{y}_{C_o}) \left[ \left( 3\frac{\epsilon_{SM,PC}}{k_B T} \bar{y}_{SM} + 3\frac{\epsilon_{PC,C}}{k_B T} \bar{y}_{C_o} \right) + \frac{1}{2}(\ln \bar{y}_{PC_o} + 1) \right] \\ &+ a^2(1-r_a)\rho^2(\bar{y}_{C_o}) \left[ \left( 3\frac{\epsilon_{SM,PC}}{k_B T} \bar{y}_{PC_o} + 3\frac{\epsilon_{SM,C}}{k_B T} \bar{y}_{C_o} \right) + \frac{1}{2}(\ln \bar{y}_{SM} + 1) \right] \\ &+ \frac{b}{2k_B T} p^2 + \left( \frac{k_B T}{\kappa_b} \right) a \frac{C^O C_{SM-C} + C_{SM} C_{C_o}}{z_o^2} \\ &- \left( \frac{k_B T}{\kappa_b} \right) \frac{p^2}{2((\sigma a/\kappa_b) + p^2)} a \frac{C_{SM} C_{C_o}}{z_o^2} \end{aligned} \quad (6)$$

$$M_{13} \equiv M_{SM,PE} = + \left( \frac{k_B T}{\kappa_b} \right) \frac{p^2}{2((\sigma a/\kappa_b) + p^2)} a \frac{C_{SM} C_{PE}}{z_o z_i}. \quad (7)$$

$$M_{14} \equiv M_{SM,PS} = + \left( \frac{k_B T}{\kappa_b} \right) \frac{p^2}{2((\sigma a/\kappa_b) + p^2)} a \frac{C_{SM} C_{PS}}{z_o z_i}. \quad (8)$$

$$M_{15} \equiv M_{SM,C_i} = + \left( \frac{k_B T}{\kappa_b} \right) \frac{p^2}{2((\sigma a/\kappa_b) + p^2)} a \frac{C_{SM} C_{C_i}}{z_o z_i}. \quad (9)$$

$$\begin{aligned}
M_{22} \equiv M_{C_o, C_o} &= a\rho(\bar{y}_{C_o}) \left[ \frac{1}{2\bar{y}_{PC_o}} + \frac{1}{2\bar{y}_{C_o}} - 6\frac{\epsilon_{PC,C}}{k_B T} \right] \\
&- a^2(1-r_a)\rho^2(\bar{y}_{C_o}) \left[ \left( 6\frac{\epsilon_{SM,PC}}{k_B T} \bar{y}_{SM} + 6\frac{\epsilon_{PC,C}}{k_B T} \bar{y}_{C_o} \right) + (\ln \bar{y}_{PC_o} + 1) \right] \\
&+ a^2(1-r_a)\rho^2(\bar{y}_{C_o}) \left[ \left( 6\frac{\epsilon_{SM,C}}{k_B T} \bar{y}_{SM} + 6\frac{\epsilon_{PC,C}}{k_B T} \bar{y}_{PC_o} \right) + (\ln \bar{y}_{C_o} + 1) \right] \\
&+ a^3(1-r_a)^2\rho^3(\bar{y}_{C_o}) \left[ \frac{f_{int}^O(\{\bar{y}_i\})}{k_B T} + \frac{f_{ent}^O(\{\bar{y}_i\})}{k_B T} \right] \\
&+ \frac{b}{k_B T} p^2 + \left( \frac{k_B T}{\kappa_b} \right) a \frac{2C^O C_{C_o-C_o} + (C_{C_o})^2}{z_o^2} \\
&- \left( \frac{k_B T}{\kappa_b} \right) \frac{p^2}{2((\sigma a/\kappa_b) + p^2)} a \left( \frac{C_{C_o}}{z_o} \right)^2. \tag{10}
\end{aligned}$$

$$M_{23} \equiv M_{C_o, PE} = + \left( \frac{k_B T}{\kappa_b} \right) \frac{p^2}{2((\sigma a/\kappa_b) + p^2)} a \frac{C_{C_o} C_{PE}}{z_o z_i}. \tag{11}$$

$$M_{24} \equiv M_{C_o, PS} = + \left( \frac{k_B T}{\kappa_b} \right) \frac{p^2}{2((\sigma a/\kappa_b) + p^2)} a \frac{C_{C_o} C_{PS}}{z_o z_i}. \tag{12}$$

$$M_{25} \equiv M_{C_o, C_i} = + \left( \frac{k_B T}{\kappa_b} \right) \frac{p^2}{2((\sigma a/\kappa_b) + p^2)} a \frac{C_{C_o} C_{C_i}}{z_o z_i}. \tag{13}$$

$$\begin{aligned}
M_{33} \equiv M_{PE, PE} &= a\rho(\bar{y}_{C_i}) \left[ \frac{1}{2\bar{y}_{PE}} + \frac{1}{2\bar{y}_{PC_i}} - 6\frac{\epsilon_{PE,PC}}{k_B T} \right] \\
&+ \frac{b}{k_B T} p^2 + \left( \frac{k_B T}{\kappa_b} \right) a \frac{(C_{PE})^2}{z_i^2} \\
&- \left( \frac{k_B T}{\kappa_b} \right) \frac{p^2}{2((\sigma a/\kappa_b) + p^2)} a \left( \frac{C_{PE}}{z_i} \right)^2. \tag{14}
\end{aligned}$$

$$\begin{aligned}
M_{34} \equiv M_{PE, PS} &= a\rho(\bar{y}_{C_i}) \left[ 3\frac{\epsilon_{PS,PE}}{k_B T} - 3\frac{\epsilon_{PE,PC}}{k_B T} - 3\frac{\epsilon_{PS,PC}}{k_B T} + \frac{1}{2\bar{y}_{PC_i}} \right] \\
&+ \frac{b}{2k_B T} p^2 + \left( \frac{k_B T}{\kappa_b} \right) a \frac{C_{PE} C_{PS}}{z_i^2}
\end{aligned}$$

$$- \left( \frac{k_B T}{\kappa_b} \right) \frac{p^2}{2((\sigma a/\kappa_b) + p^2)} a \frac{C_{PE} C_{PS}}{z_i^2}. \quad (15)$$

$$\begin{aligned} M_{35} \equiv M_{PE,Ci} &= a^2(1-r_a)\rho^2(\bar{y}_{Ci}) \left[ 3 \frac{\epsilon_{PE,PC}}{k_B T} \bar{y}_{PCi} + 3 \frac{\epsilon_{PE,PS}}{k_B T} \bar{y}_{PS} + 3 \frac{\epsilon_{PE,C}}{k_B T} \bar{y}_{Ci} + \frac{1}{2}(\ln \bar{y}_{PE} + 1) \right] \\ &- a^2(1-r_a)\rho^2(\bar{y}_{Ci}) \left[ 3 \frac{\epsilon_{PE,PC}}{k_B T} \bar{y}_{PE} + 3 \frac{\epsilon_{PS,PC}}{k_B T} \bar{y}_{PS} + 3 \frac{\epsilon_{PC,C}}{k_B T} \bar{y}_{Ci} + \frac{1}{2}(\ln \bar{y}_{PCi} + 1) \right] \\ &+ a\rho(\bar{y}_{Ci}) \left[ 3 \frac{\epsilon_{PE,C}}{k_B T} - 3 \frac{\epsilon_{PC,C}}{k_B T} - 3 \frac{\epsilon_{PE,PC}}{k_B T} + \frac{1}{2\bar{y}_{PCi}} \right] \\ &+ \frac{b}{2k_B T} p^2 + \left( \frac{k_B T}{\kappa_b} \right) a \frac{[C^I C_{PE-C} + C_{PE} C_{Ci}]}{z_i^2} \\ &- \left( \frac{k_B T}{\kappa_b} \right) \frac{p^2}{2((\sigma a/\kappa_b) + p^2)} a \frac{C_{PE} C_{Ci}}{z_i^2}. \end{aligned} \quad (16)$$

$$\begin{aligned} M_{44} \equiv M_{PS,PS} &= a\rho(\bar{y}_{Ci}) \left[ \frac{1}{2\bar{y}_{PS}} + \frac{1}{2\bar{y}_{PCi}} - 6 \frac{\epsilon_{PS,PC}}{k_B T} \right] \\ &+ \frac{b}{k_B T} p^2 + \left( \frac{k_B T}{\kappa_b} \right) a \frac{(C_{PS})^2}{z_i^2} \\ &- \left( \frac{k_B T}{\kappa_b} \right) \frac{p^2}{2((\sigma a/\kappa_b) + p^2)} a \left( \frac{C_{PS}}{z_i} \right)^2. \end{aligned} \quad (17)$$

$$\begin{aligned} M_{45} \equiv M_{PS,Ci} &= a^2(1-r_a)\rho^2(\bar{y}_{Ci}) \left[ 3 \frac{\epsilon_{PS,PC}}{k_B T} \bar{y}_{PCi} + 3 \frac{\epsilon_{PE,PS}}{k_B T} \bar{y}_{PE} + 3 \frac{\epsilon_{PS,C}}{k_B T} \bar{y}_{Ci} + \frac{1}{2}(\ln \bar{y}_{PS} + 1) \right] \\ &- a^2(1-r_a)\rho^2(\bar{y}_{Ci}) \left[ 3 \frac{\epsilon_{PS,PC}}{k_B T} \bar{y}_{PS} + 3 \frac{\epsilon_{PE,PC}}{k_B T} \bar{y}_{PE} + 3 \frac{\epsilon_{PC,C}}{k_B T} \bar{y}_{Ci} + \frac{1}{2}(\ln \bar{y}_{PCi} + 1) \right] \\ &+ a\rho(\bar{y}_{Ci}) \left[ 3 \frac{\epsilon_{PS,C}}{k_B T} - 3 \frac{\epsilon_{PC,C}}{k_B T} - 3 \frac{\epsilon_{PS,PC}}{k_B T} + \frac{1}{2\bar{y}_{PCi}} \right] \\ &+ \frac{b}{2k_B T} p^2 + \left( \frac{k_B T}{\kappa_b} \right) a \frac{[C^I C_{PS-C} + C_{PS} C_{Ci}]}{z_i^2} \\ &- \left( \frac{k_B T}{\kappa_b} \right) \frac{p^2}{2((\sigma a/\kappa_b) + p^2)} a \frac{C_{PS} C_{Ci}}{z_i^2}. \end{aligned} \quad (18)$$

$$M_{55} \equiv M_{Ci,Ci} = a^3(1-r_a)^2 \rho^3(\bar{y}_{Ci}) \left[ \frac{f_{int}^I(\{\bar{y}\}_i)}{k_B T} + \frac{f_{ent}^I(\{\bar{y}\}_i)}{k_B T} \right]$$

$$\begin{aligned}
& + a^2(1 - r_a)\rho^2(\bar{y}_{Ci}) \left[ \left( 6\frac{\epsilon_{PE,C}}{k_B T} \bar{y}_{PE} + 6\frac{\epsilon_{PS,C}}{k_B T} \bar{y}_{PS} + 6\frac{\epsilon_{PC,C}}{k_B T} \bar{y}_{PCi} \right) + (\ln \bar{y}_{Ci} + 1) \right] \\
& - a^2(1 - r_a)\rho^2(\bar{y}_{PCi}) \left[ \left( 6\frac{\epsilon_{PE,PC}}{k_B T} \bar{y}_{PE} + 6\frac{\epsilon_{PS,PC}}{k_B T} \bar{y}_{PS} + 6\frac{\epsilon_{PC,C}}{k_B T} \bar{y}_{PCi} \right) + (\ln \bar{y}_{PCi} + 1) \right] \\
& + a\rho(\bar{y}_{Ci}) \left[ \frac{1}{2\bar{y}_{Ci}} + \frac{1}{2\bar{y}_{PCi}} - 3\frac{\epsilon_{PC,C}}{k_B T} \right] \\
& + \frac{b}{k_B T} p^2 + \left( \frac{k_B T}{\kappa_b} \right) a \frac{[2C^I C_{Ci-Ci} + (C_{Ci})^2]}{z_i^2} \\
& - \left( \frac{k_B T}{\kappa_b} \right) \frac{p^2}{2((\sigma a/\kappa_b) + p^2)} a \left( \frac{C_{Ci}}{z_i} \right)^2
\end{aligned} \tag{19}$$
